# Supplementary material for: Characterization of the Flagellar Collar Reveals Structural Plasticity Essential for Spirochete Motility
Source: PubMed Central journal article supplement (PMC8609358; doi:10.1128/mbio.02494-21), 2021-11-23
Supplement: mbio.02494-21-st001.pdf [file mbio.02494-21-st001.pdf]

| strain                                                     | Camera | Pixel size (Å) | VPP | tilt range  | No. of tomograms | No. of motors | No. of collar subunits used for focus refinement |
|------------------------------------------------------------|--------|----------------|-----|-------------|------------------|---------------|--------------------------------------------------|
| WT                                                         | K2     | 2.747          | Yes | -51° to 51° | 256              | 1748          | 5232                                             |
|                                                            |        |                | No  |             | 189              | 1202          | 11928                                            |
| <i>Δf1cB</i><br>( <i>Δbb0058</i> )                         | K2     | 3.483          | Yes | -51° to 51° | 41               | 172           | --                                               |
|                                                            | K3     | 3.384          |     | -48° to 48° | 132              | 885           | --                                               |
| <i>(f1cB<sup>+</sup>)</i><br>( <i>bb0058<sup>+</sup></i> ) | K2     | 1.386          | No  | -51° to 51° | 79               | 290           | --                                               |
| <i>Δf1cC</i><br>( <i>Δbb0624</i> )                         | K2     | 3.483          | Yes | -51° to 51° | 40               | 346           | 5536                                             |
|                                                            | K3     | 3.384          |     | -48° to 48° | 129              | 798           | 12256                                            |
| <i>ΔmotB</i>                                               | K2     | 2.747          | Yes | -51° to 51° | 233              | 1448          | 9427                                             |
